# Supplementary material
Source: Springer Nature journal article supplement (https://www.springermedizin.de/resource/supplementary/12957_2012_1148_MOESM1_ESM.pdf/9561946)
Supplement: MOESM1 [file 9561946]

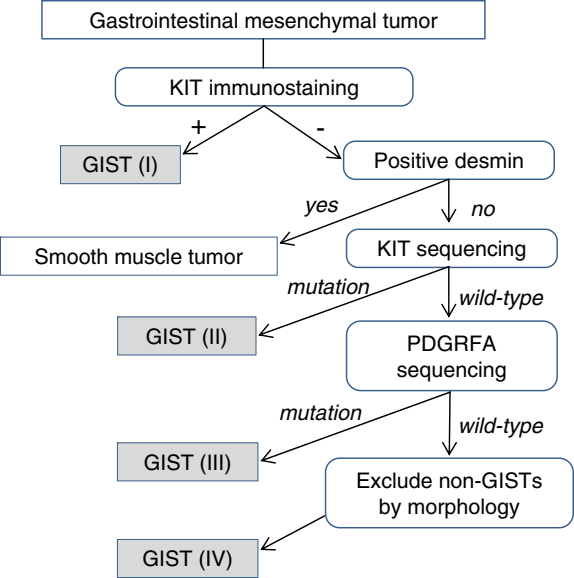

Gastrointestinal mesenchymal tumor

KIT immunostaining

+

-

GIST (I)

Positive desmin

*yes*

*no*

Smooth muscle tumor

KIT sequencing

*mutation*

*wild-type*

GIST (II)

PDGRFA  
sequencing

*mutation*

*wild-type*

GIST (III)

Exclude non-GISTs  
by morphology

GIST (IV)
